# Supplementary material
Source: Springer Nature journal article supplement (https://www.springermedizin.de/resource/supplementary/12960_2006_91_MOESM3_ESM.pdf/9570394)

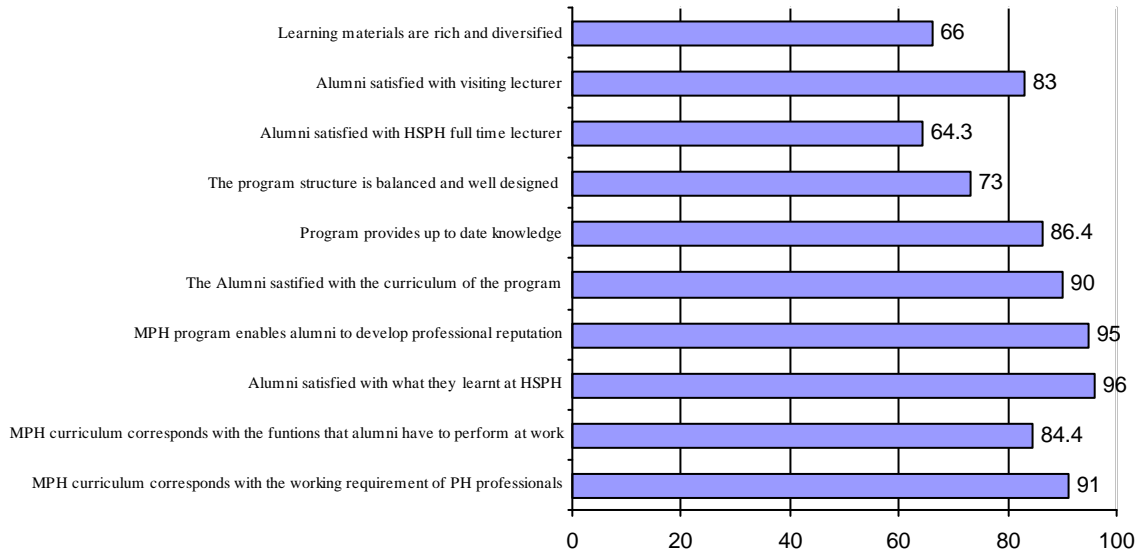

Supplement: MOESM3 [file 9570394]
